# Supplementary material for: Game jams for cultural safety training in Colombian medical education: a pilot randomised controlled trial
Source: HighWire-hosted journal article supplement (doi:10.1136/bmjopen-2020-042892), 2021-05-01
Supplement: bmjopen-2020-042892supp002_data_supplement.pdf [file bmjopen-2020-042892supp002_data_supplement.pdf]

## Additional file 2. Questions used to assess each component of the CASCADA model

The CASCADA (conscious knowledge, attitudes, subjective norms, change intention, sense of agency, discussion, and behavior/action) model of planned behavior<sup>1</sup> included the following variables:

| <b>Component</b>    | <b>Statement</b>                                                                                                                                                                  |
|---------------------|-----------------------------------------------------------------------------------------------------------------------------------------------------------------------------------|
| Conscious knowledge | "You know what the cultural safety approach is."                                                                                                                                  |
| Attitude            | "You think that traditional medicine is important to address health problems."                                                                                                    |
| Subjective norms    | "Although many physicians disapprove of traditional medicine, you think that these beliefs could improve your patients' health."                                                  |
| Intention to change | "You are open to including your patients' cultural beliefs and practices in the health decision-making process."                                                                  |
| Agency              | "You feel prepared with the knowledge and skills to prudently incorporate your patients' cultural practices in the health decision-making process."                               |
| Discussion          | "You will discuss cultural safety with other students and physicians so they can prudently incorporate their patients' cultural practices in the health decision-making process." |
| Action              | "From now on you will seek opportunities to include the traditional knowledge and practices of your patients in your clinical practice."                                          |

<sup>1</sup> Andersson N. Building the community voice into planning: 25 years of methods development in social audit. BMC Health Serv Res 2011;11:S1. doi:10.1186/1472-6963-11-S2-S1
